# Supplementary material for: A rapid and quantitative method to detect human circulating tumor cells in a preclinical animal model
Source: Springer Nature journal article supplement (doi:10.1186/s12885-017-3419-x), 2017-06-23

# Supplementary figure 1

A

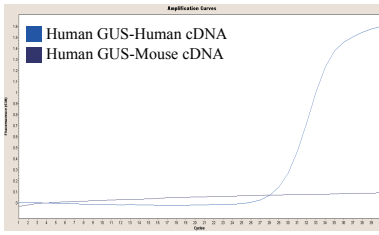

B

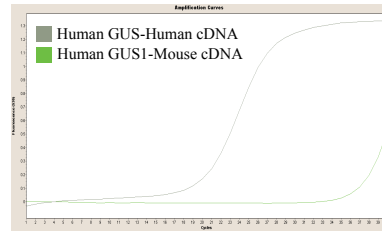

C

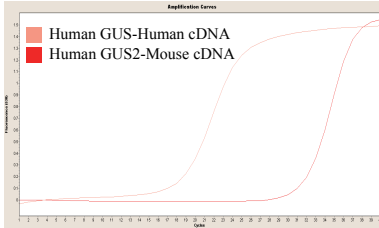

D

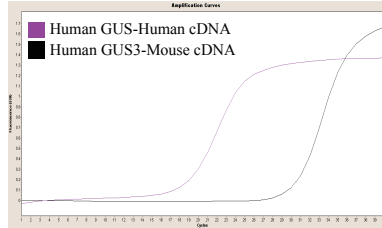

E

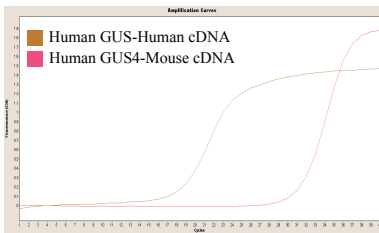

F

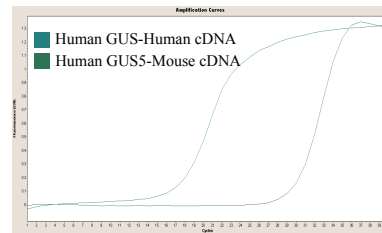

Supplement: MOESM1 [file 12467576]
