# Supplementary material for: A rapid and quantitative method to detect human circulating tumor cells in a preclinical animal model
Source: Springer Nature journal article supplement (doi:10.1186/s12885-017-3419-x), 2017-06-23
Supplement: MOESM2 [file 12467576]

# Supplementary figure 2

```
Consensus GGTGTTGGGAAAGCAGCCTGTTTACTTTCAGAGTACAGTACCTCAGTCTAGACTCAAAGGTGTCCTGAGACTCCCTCCTGAGTCTGGTGTGTTTCTTGGGATTTGGTGGTGGTCTCCGCGACTTGGAGCTGAGATCAGAGCTTTCTTGGGATGATAATATTTGGTGGTCTTATTCAGTGGTGGTCTCCGCTGGTGGTGGTCCAAAG
Sequences
Mouse GUSB GGTGTTGGGAAAGCAGCCTGTTTACTTTCAGAGTACAGTACCTCAGTCTAGACTCAAAGGTGTCCTGAGACTCCCTCAGTCTGGTGTGTTTCTTGGGATTTGGTGGTGGTCTCCGCGACTTGGAGCTGAGATCAGAGCTTTCTTGGGATGATAATATTTGGTGGTCTTATTCAGTGGTGGTCTCCGCTGGTGGTGGTCCAAAG
Human GUSB GGTGTTGGGAAAGCAGCCTGTTTACTTTCAGAGTACAGTACCTCAGTCTAGACTCAAAGGTGTCCTGAGACTCCCTCAGTCTGGTGTGTTTCTTGGGATTTGGTGGTGGTCTCCGCGACTTGGAGCTGAGATCAGAGCTTTCTTGGGATGATAATATTTGGTGGTCTTATTCAGTGGTGGTCTCCGCTGGTGGTGGTCCAAAG
```
